# Supplementary material for: Quantum dots-based fluoroimmunoassay for the simultaneous detection of clothianidin and thiacloprid in environmental and agricultural samples
Source: Royal Society of Chemistry journal article supplement (doi:10.1039/c4ra13305f), 2014-12-03
Supplement: c4ra13305f1.pdf [file c4ra13305f1.pdf]

### Supplementary data

**Fig. S1** Fluorescence spectra of QDs and QDs-labeled antibodies.

**Fig. S2** Fluorescence spectra of QDs602/C-PcAb and QDs510/T-PcAb for the simultaneous detection.

**Fig. S3** Effect of organic solvent, ionic strength and pH value on FLISA.



**Fig. S1**



**Fig. S2**



Fig. S3
